# Supplementary material for: Preparation of an iron porphyrin-based polymer monolithic column via atom transfer radical polymerization for the separation of proteins and small molecules
Source: Royal Society of Chemistry journal article supplement (doi:10.1039/c7ay00472a), 2017-01-01
Supplement: c7ay00472a1.pdf [file c7ay00472a1.pdf]

Electronic Supplementary Information for Publication

**Preparation of iron porphyrin-based polymer monolithic column via atom transfer radical polymerization for separation of proteins and small molecules**

Zhen Wei<sup>a</sup>, Doudou Zhang<sup>a,b</sup>, Cheng Li<sup>c</sup>, Ligai Bai<sup>a,b\*</sup>, Haiyan Liu<sup>a,b\*</sup>, Hongyuan Yan

<sup>a</sup> College of Pharmaceutical Sciences, Hebei University, Baoding 071002, China;

<sup>b</sup> Key Laboratory of Medicinal Chemistry and Molecular Diagnosis, Ministry of Education, Hebei University, Baoding 071002, China;

<sup>c</sup> Baoding Dolayuba Company Limited, Baoding, 071000, China.

\*Corresponding author: Ligai Bai, College of Pharmaceutical Sciences, Hebei University, Baoding, Hebei, 071002, China.

Tel: +86 312 5971107;

Fax: +86 312 5971107.

E-mail address: [bailigai@163.com](mailto:bailigai@163.com)

### **Captions for appendix figures in electronic supplementary information**

Fig. S1 Chemical structure of iron porphyrin (hemin)

Fig. S2 Image of thermogravimetric analysis for monolith C

Fig. S3 The micro- and mesopore size distribution of monolith C

a: distribution of pore surface area; b: distribution of pore volume

Fig. S4 Relationship of linear velocity and pressure drop of monolith C

Fig. S5 Numbers of identified proteins by LC/MS from human plasma, peak 2 and peak 4 in

Fig. 4b

The resulting LC/MS data were matched with “human\_txid9606\_110574.fasta” via “Proteome Discoverer”.

Fig. S6 Plot of  $k$  and percentage content of ACN

Table S1 Chromatographic parameters of Fig. 5

<sup>a</sup>: Resolution of each peak was calculated with the former one.

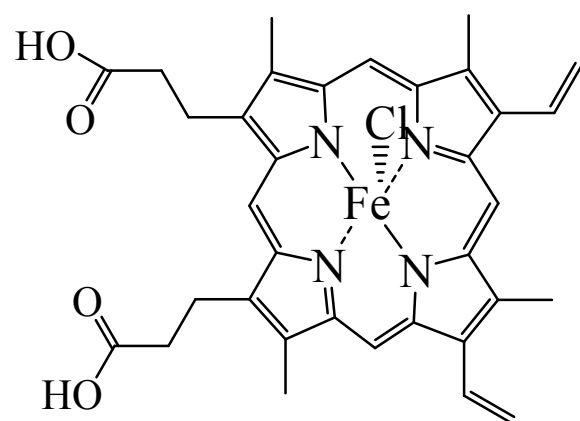

**Fig. S1**

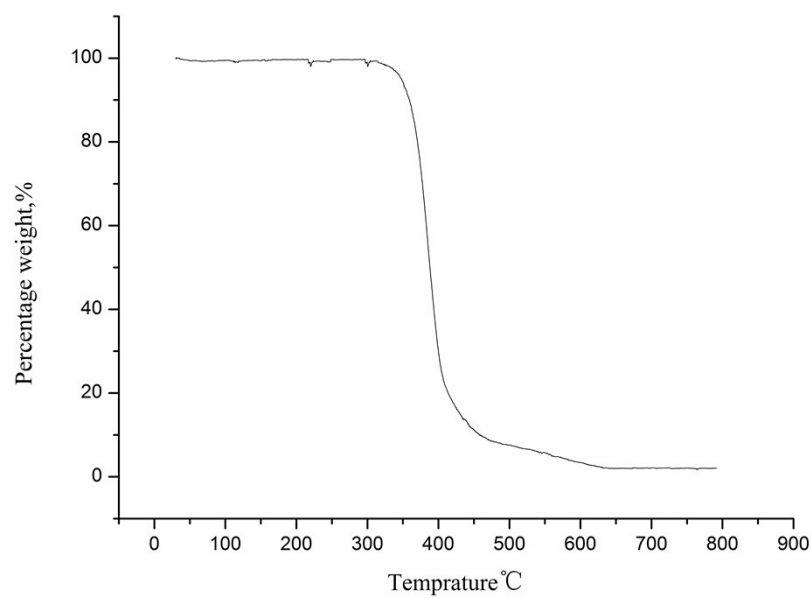

**Fig. S2**

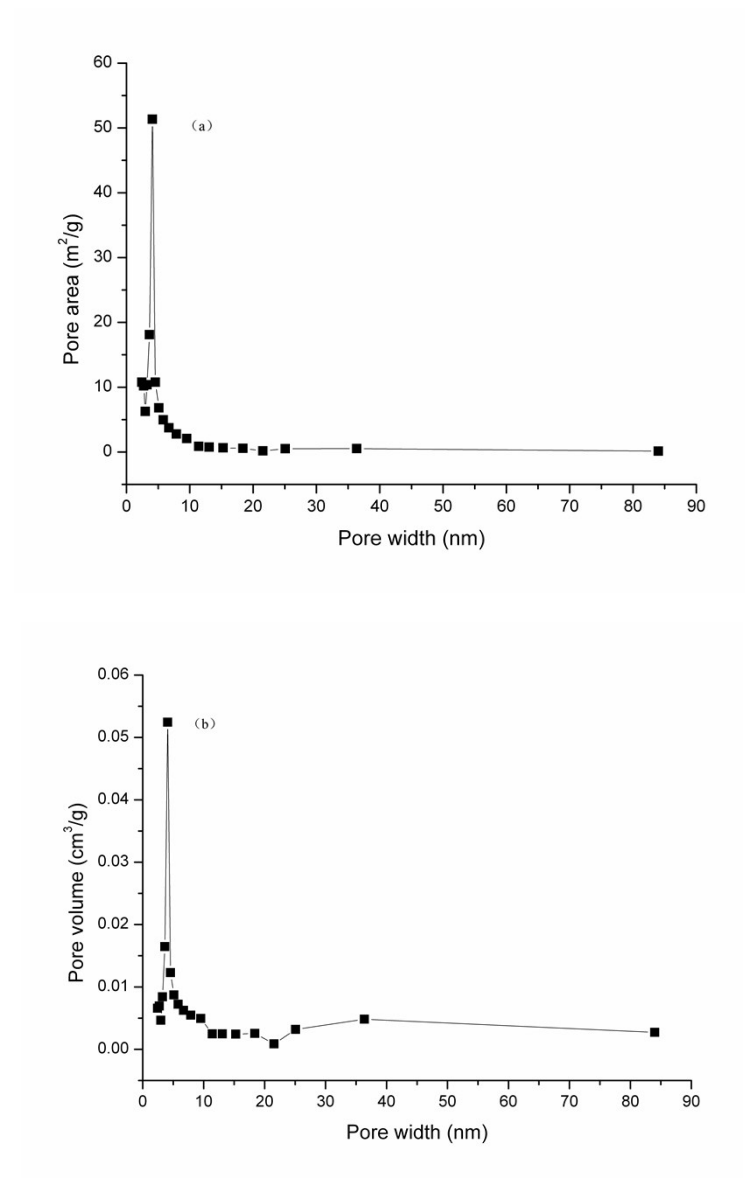

**Fig. S3**

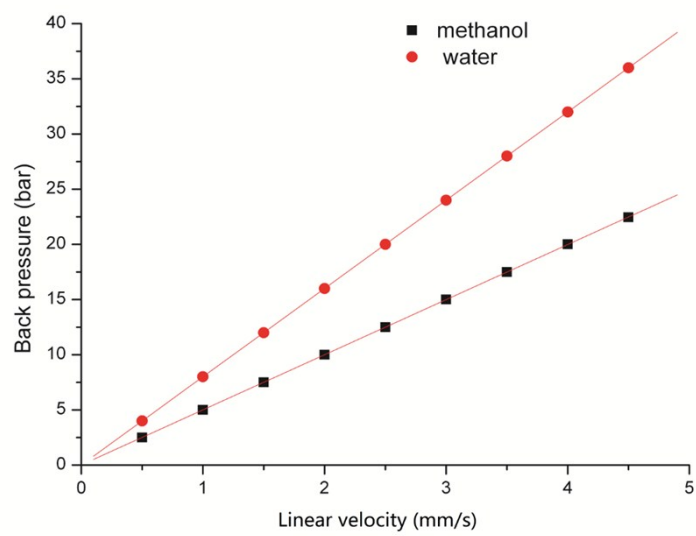

**Fig. S4**

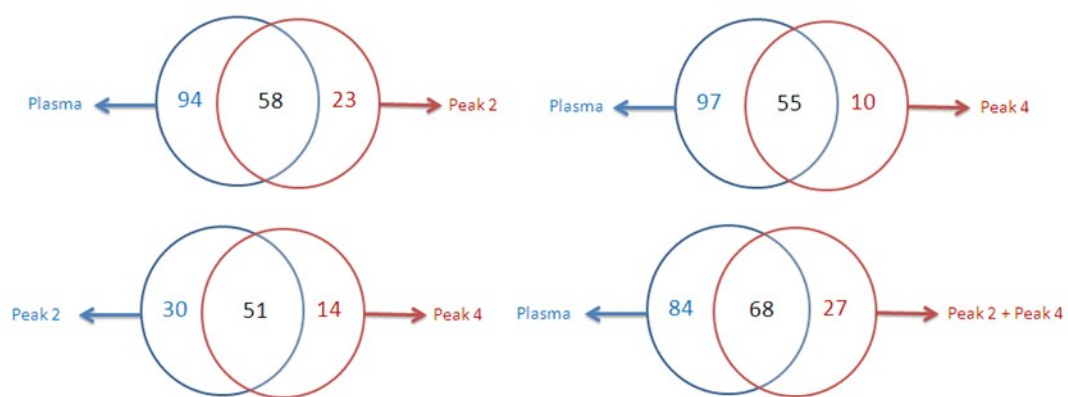

**Fig. S5**

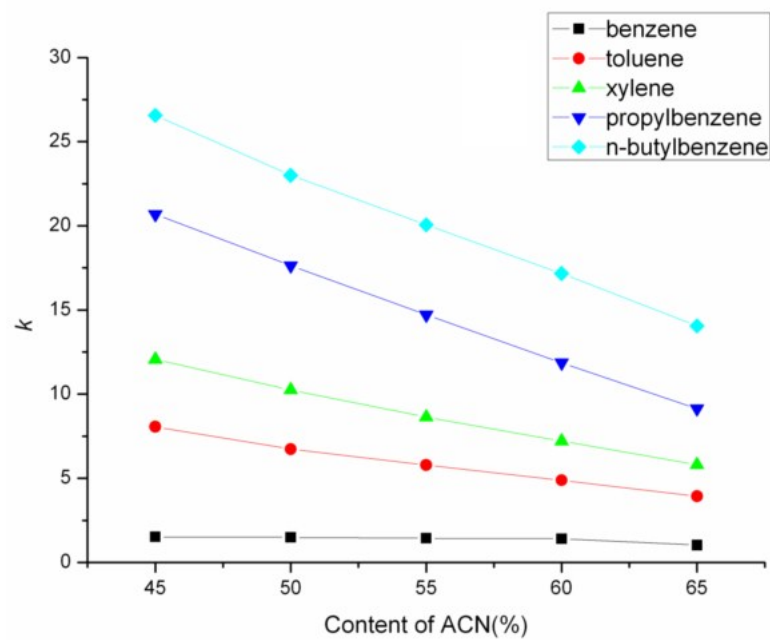

**Fig. S6**



**Table S1**

| Analyte                             | benzene | toluene | xylene | propylbenzene | n-butylbenzene |
|-------------------------------------|---------|---------|--------|---------------|----------------|
| Retention time (min)                | 1.203   | 2.942   | 4.105  | 6.430         | 9.086          |
| Symmetry factor                     | 1.031   | 0.980   | 0.980  | 1.021         | 1.010          |
| Resolution <sup>a</sup>             | -       | 2.890   | 2.326  | 3.394         | 2.887          |
| Column efficiency(plates per meter) | 9 900   | 25 200  | 28 600 | 26 900        | 29 600         |
